# Supplementary material for: The Amyloid-beta rich CNS environment alters myeloid cell functionality independent of their origin
Source: PubMed Central journal article supplement (PMC7189379; doi:10.1038/s41598-020-63989-3), 2020-04-28
Supplement: 41598_2020_63989_MOESM1_ESM.pdf [file 41598_2020_63989_MOESM1_ESM.pdf]

## Supplemental Data

### The Amyloid-beta rich CNS environment alters myeloid cell functionality independent of their origin

**Authors:** Natalia Drost<sup>1,§</sup>, Judith Houtman<sup>1,2§</sup>, Zoltán Cseresnyés<sup>3,4</sup>, Raluca Niesner<sup>3,5</sup>, Jan-Leo Rinnenthal<sup>1,6</sup>, Kelly R Miller<sup>1,7</sup>, Stefan Prokop<sup>1,8,9,10,&</sup>, Frank L Heppner<sup>1,,11,12,13,&,\*</sup>

#### Affiliations:

<sup>1</sup> Department of Neuropathology, Charité – Universitätsmedizin Berlin, corporate member of Freie Universität Berlin, Humboldt-Universität zu Berlin, and Berlin Institute of Health, 10117 Berlin, Germany

<sup>2</sup> Present address: German Center for Neurodegenerative Diseases (DZNE) Dresden, 01307 Dresden, Germany

<sup>3</sup> Deutsches Rheuma-Forschungszentrum Berlin, a Leibniz Institute, Charitéplatz 1, 10117 Berlin, Germany

<sup>4</sup> Present address: Applied Systems Biology, Leibniz Institute for Natural Product Research and Infection Biology – Hans Knöll Institute, Jena, Germany

<sup>5</sup> Veterinary Medicine, Freie Universität, Berlin, Oertzenweg 19b, 14163 Berlin, Germany

<sup>6</sup> Present address: Department of Pathology, Sana Klinikum Offenbach, 63069 Offenbach, Germany

<sup>7</sup> Present address: Nanostring Technologies, Seattle, WA, USA.

<sup>8</sup> Present address: Department of Pathology, University of Florida, Gainesville, FL, United States

<sup>9</sup> Present address: Center for Translational Research in Neurodegenerative Disease, University of Florida, Gainesville, FL, United States

<sup>10</sup> Present address: Fixel Institute for Neurological Diseases, University of Florida, Gainesville, FL, United States

<sup>11</sup> Cluster of Excellence, NeuroCure, Charitéplatz 1, 10117 Berlin, Germany

<sup>12</sup> Berlin Institute of Health (BIH), 10117 Berlin, Germany

<sup>13</sup> German Center for Neurodegenerative Diseases (DZNE) Berlin, 10117 Berlin, Germany

<sup>§</sup> authors contributed equally

<sup>&</sup> shared senior authorship

\* Corresponding author, [frank.heppner@charite.de](mailto:frank.heppner@charite.de)

Figure S1

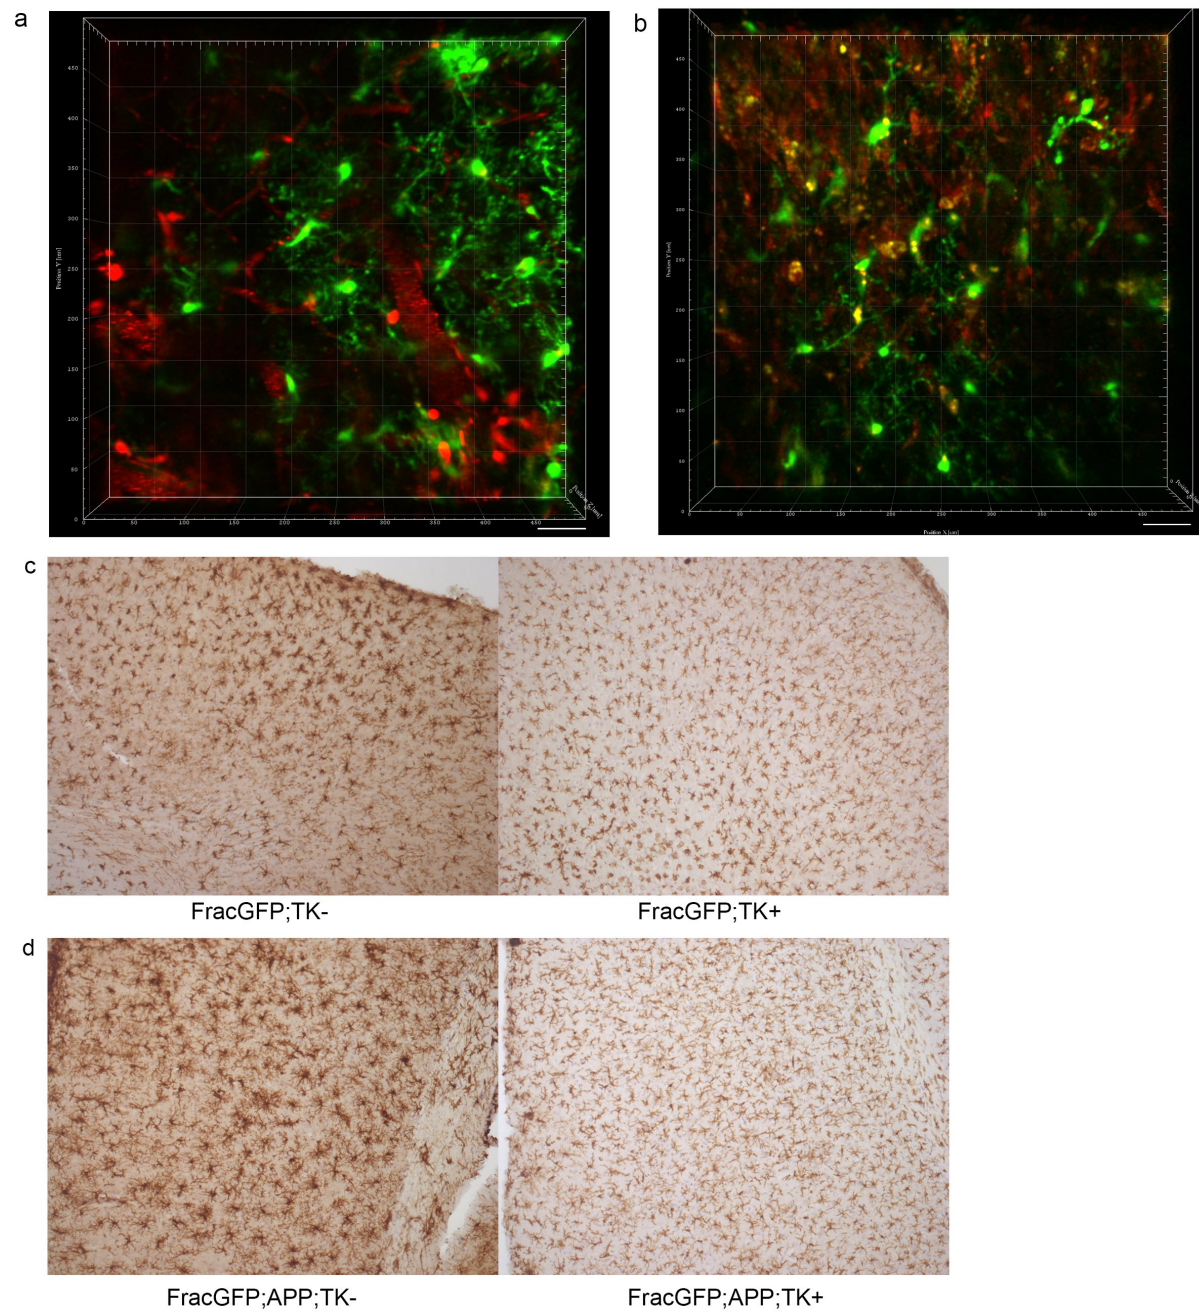

**Figure S1. Microglia morphology and distribution.** (a, b) 3D images created with Imaris representing microglia (a) and PDMC (b) morphology at day 6 of imaging. (c, d) Iba1+ cell distribution and morphology throughout the cortex in the different animal models used.

Figure S2

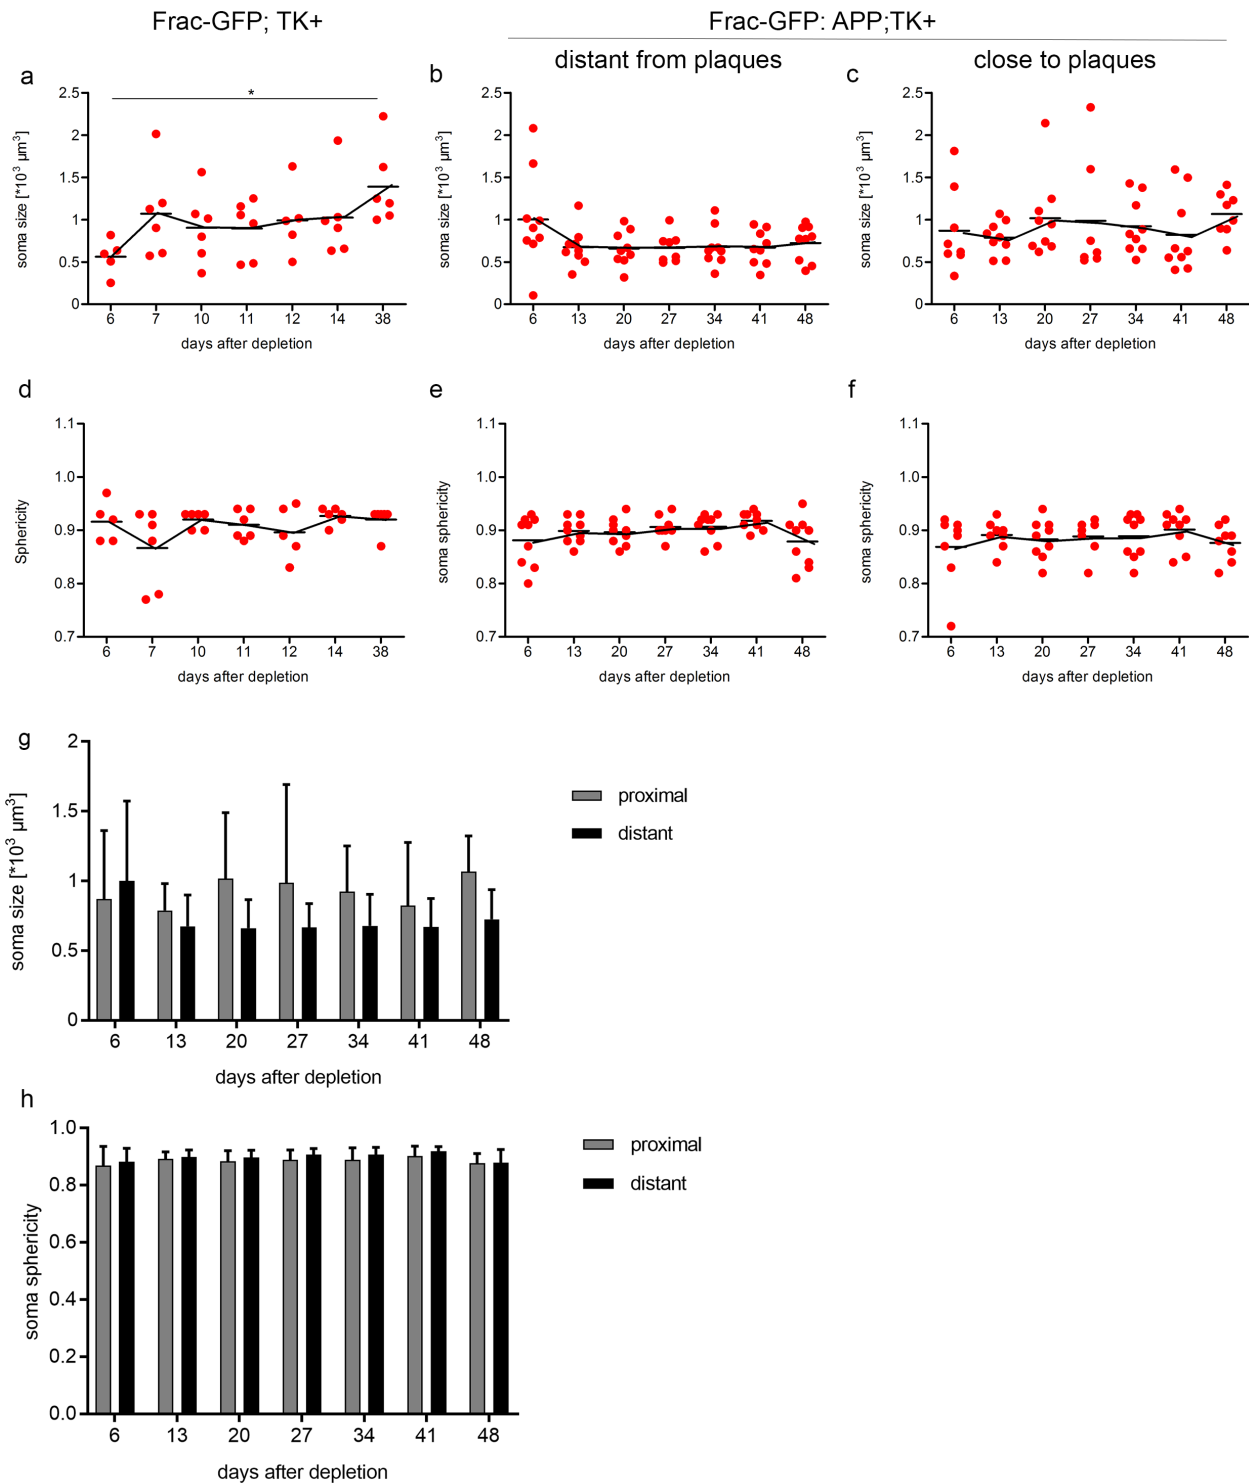

**Fig. S2 Soma morphology assessment over time.** Two morphological parameters assessed for the PDMCs of each of the indicated genotypes for each time point after surgery: (a-c) soma size, (d-f) soma sphericity. Statistics: 1-way ANOVA, with Tukey's post-hoc test. \*  $p < 0.05$ . (g, h) comparison of proximal and distant PDMCs in APP animals over time. Statistics: 2-way ANOVA.

Figure S3

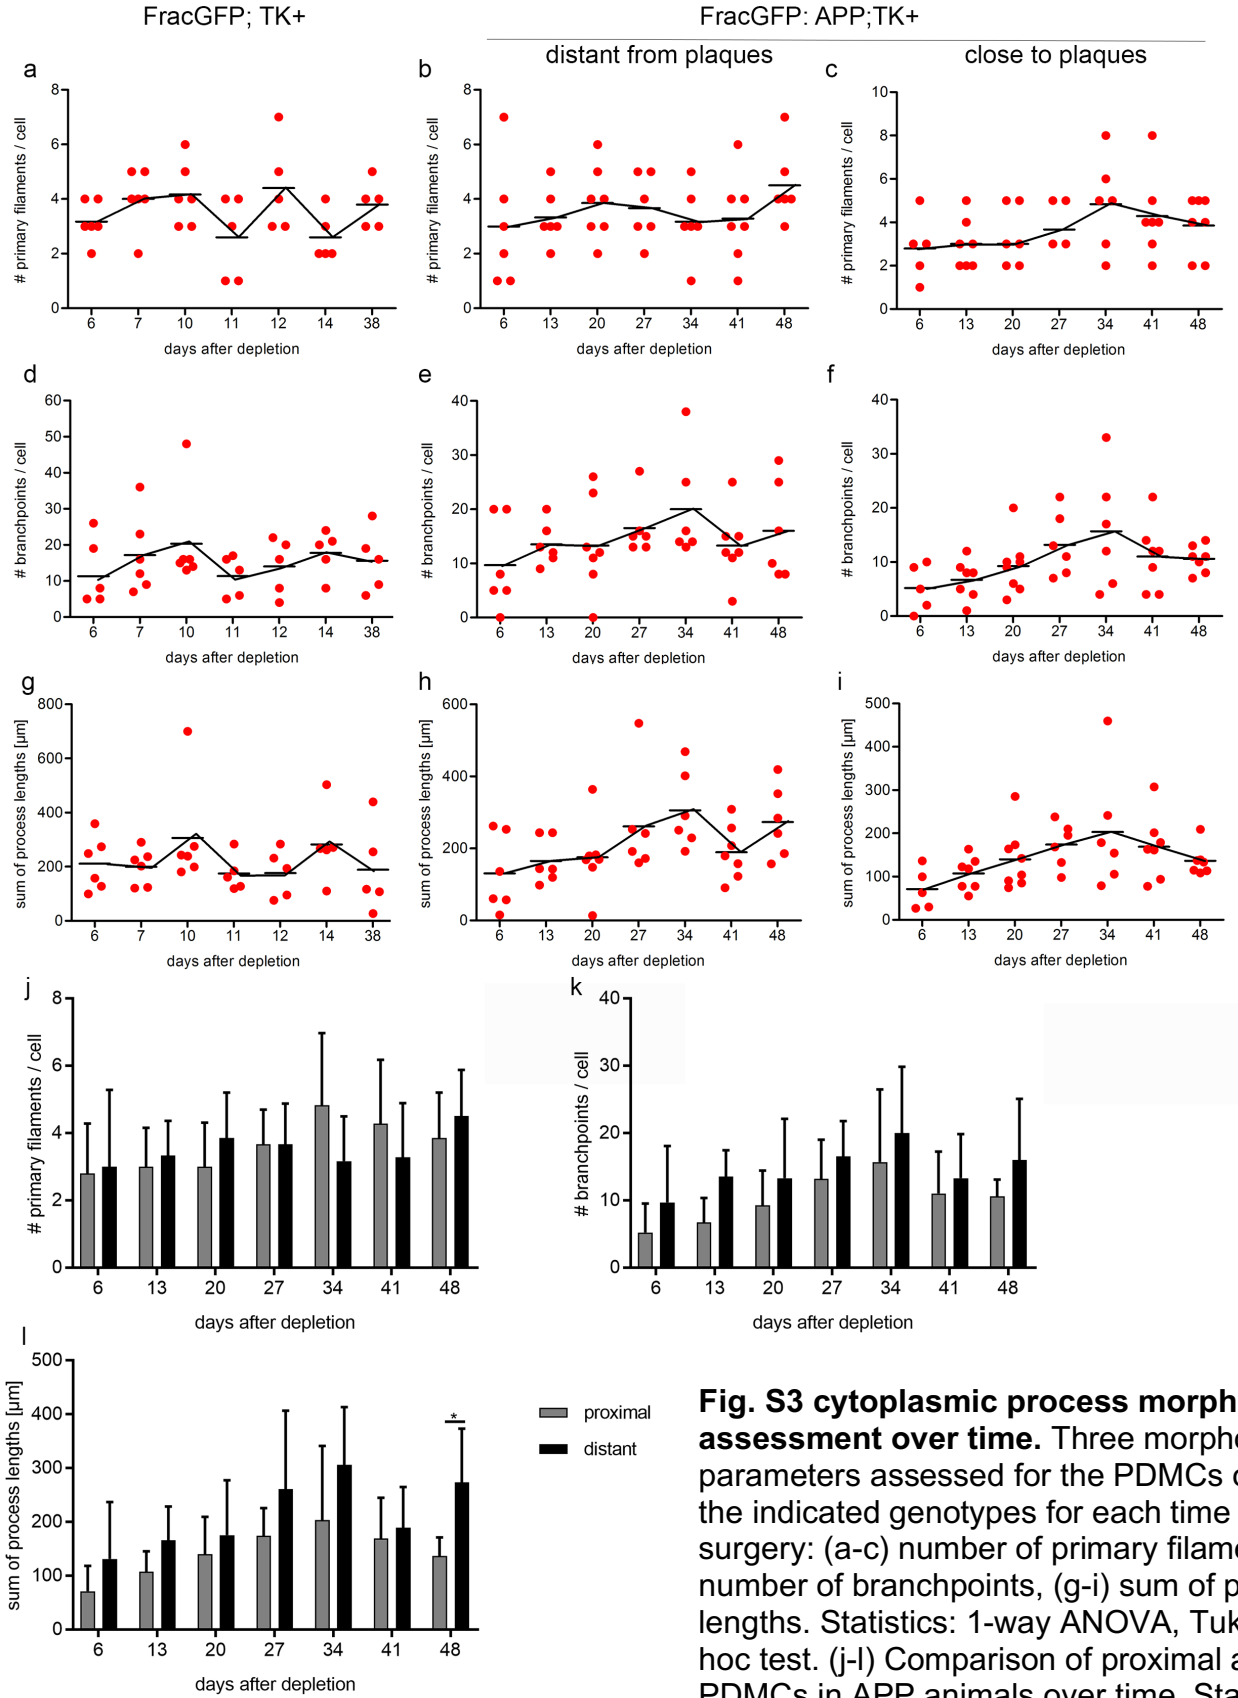

**Fig. S3 cytoplasmic process morphology assessment over time.** Three morphological parameters assessed for the PDMCs of each of the indicated genotypes for each time point after surgery: (a-c) number of primary filaments, (d-f) number of branchpoints, (g-i) sum of protrusion lengths. Statistics: 1-way ANOVA, Tukey's post-hoc test. (j-l) Comparison of proximal and distant PDMCs in APP animals over time. Statistics: 2-way ANOVA. \*  $p < 0.05$ .

Figure S4

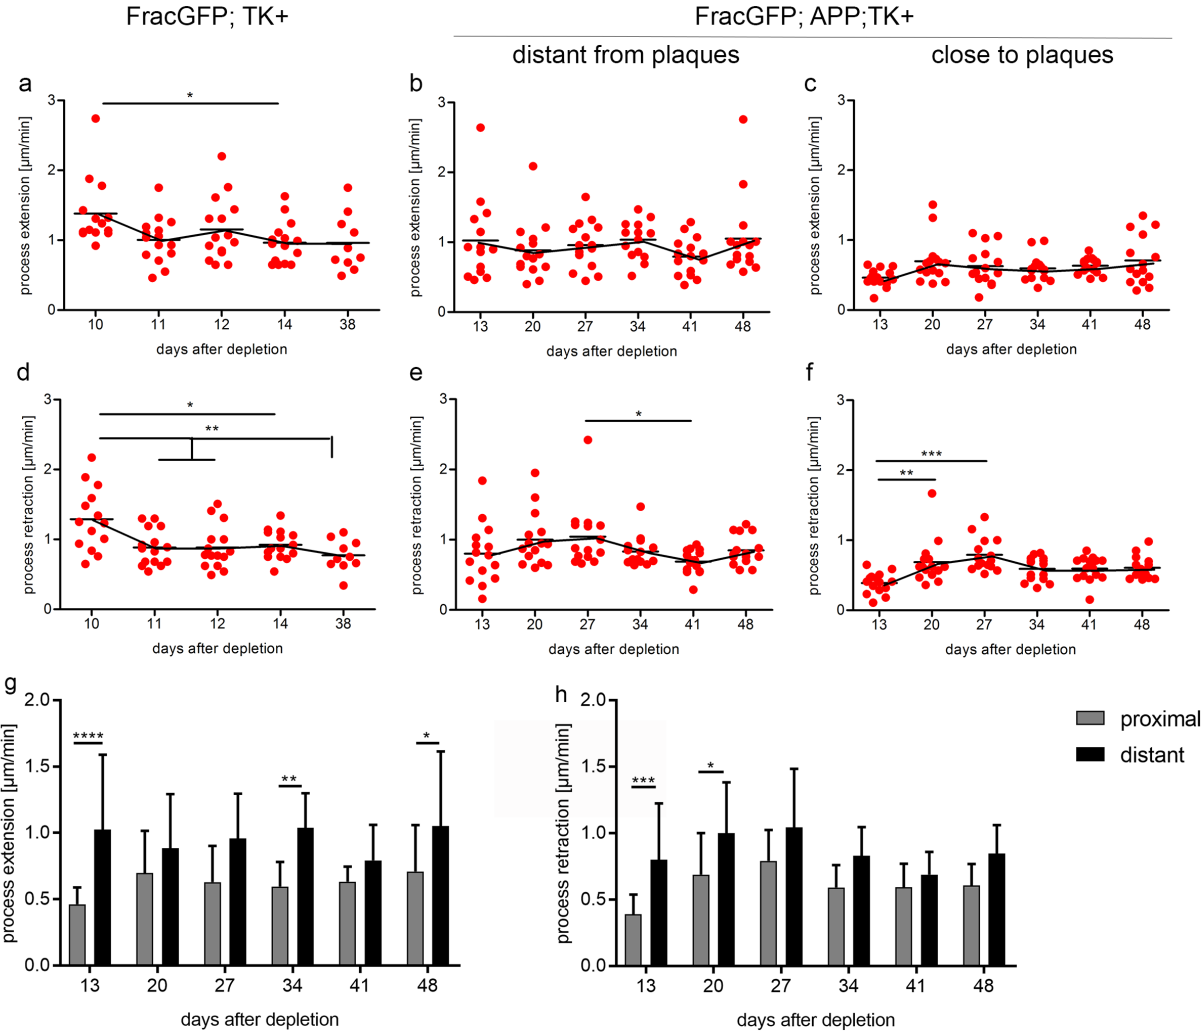

**Fig. S4 cytoplasmic process activity assessment over time.** Both process extension (a-c) as well as process retraction (d-f) were assessed for the PDMCs of each of the indicated genotypes for each time point after surgery. Statistics: 1-way ANOVA, Tukey's post-hoc test. \* p < 0.05, \*\* p < 0.01, \*\*\* p < 0.001. (g,h) Comparison of proximal and distant PDMCs in APP animals over time. Statistics: 2-way ANOVA. \* p < 0.05, \*\*\* p < 0.001, \*\*\*\* p < 0.0001.

**Supplementary Movie 1. Day 6 after surgery.**

Animation of the 3D image of a field of view 6 days after surgery, displaying homeostatic GFP+ microglia.

**Supplementary Movie 2. Day 24 after surgery.**

Animation of the 3D image of a field of view 24 days after surgery, displaying homeostatic GFP+ microglia.

**Supplementary Movie 3. Microglia response to laser lesion in FracGFP;TK- animals**

Time lapse of 28 minutes of the microglia response to a laser lesion in FracGFP;TK- animals.

**Supplementary Movie 4. PDMC response to laser lesion in FracGFP;TK+ animals**

Time lapse of 28 minutes of the PDMC response to a laser lesion in FracGFP;TK+ animals.

**Supplementary Movie 5. Microglia response to laser lesion in FracGFP;APP+;TK- animals**

Time lapse of 28 minutes of the microglia response to a laser lesion in FracGFP;APP;TK- animals.

**Supplementary Movie 6. PDMC response to laser lesion in FracGFP;APP+;TK+ animals**

Time lapse of 28 minutes of the PDMC response to a laser lesion in FracGFP;APP;TK+ animals.
